# Supplementary material for: Facile synthesis of size-controllable monodispersed ferrite nanospheres
Source: Royal Society of Chemistry journal article supplement (doi:10.1039/c0jm00159g), 2010-01-01
Supplement: c0jm00159g.pdf [file c0jm00159g.pdf]

# Facile Synthesis of Size-Controllable Monodispersed Ferrite Nanospheres

*Shouhu Xuan,<sup>†</sup> Feng Wang<sup>†</sup>, Yi-Xiang J. Wang,<sup>‡</sup> Jimmy C. Yu,<sup>†</sup>*

*Ken Cham-Fai Leung<sup>\*†</sup>*

<sup>†</sup> Center of Novel Functional Molecules, Department of Chemistry, The Chinese  
University of Hong Kong, Shatin, NT, Hong Kong SAR, P. R. China

<sup>‡</sup> Department of Diagnostic Radiology and Organ Imaging, Prince of Wales Hospital,  
The Chinese University of Hong Kong, Shatin, NT, Hong Kong SAR, P. R. China

## Supplementary Information

\* Corresponding author  
Center of Novel Functional Molecules  
Department of Chemistry  
The Chinese University of Hong Kong  
Shatin, NT  
Hong Kong SAR, P. R. China  
Phone: (+852) 2609 6342  
Fax: (+852) 2603 5057  
E-mail: cfleung@cuhk.edu.hk

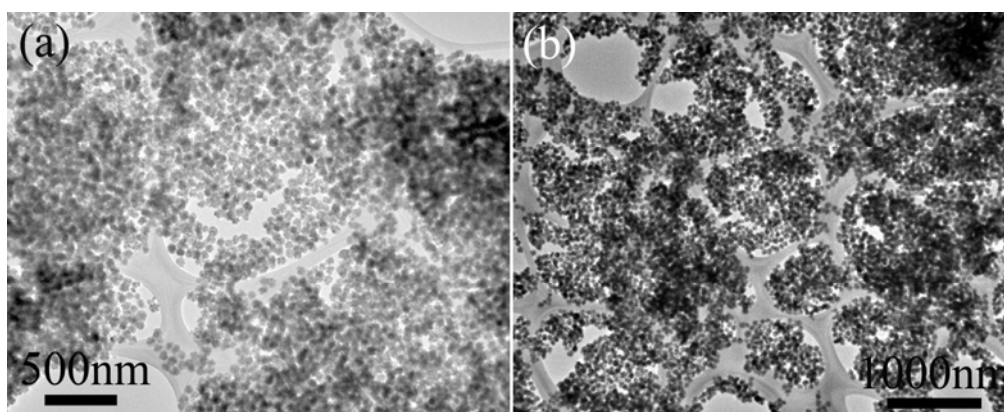

**Figure S1.** TEM images of the as-prepared (a) MnFe<sub>2</sub>O<sub>4</sub> and (b) NiFe<sub>2</sub>O<sub>4</sub> nanospheres.

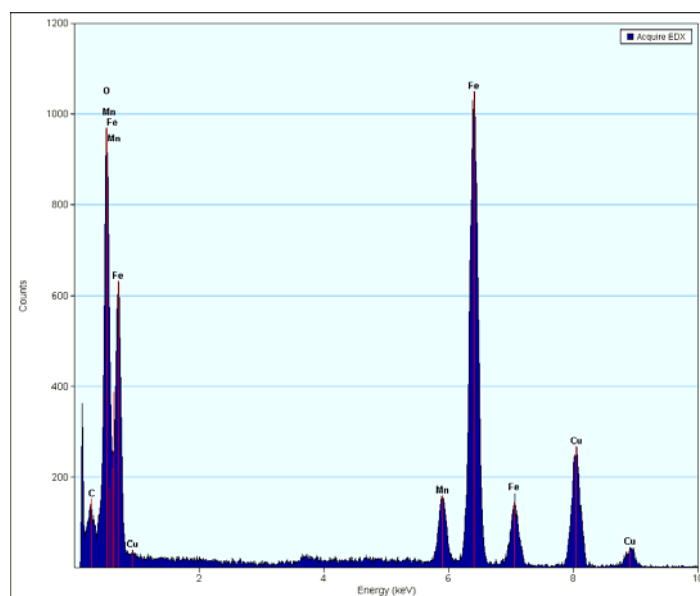

**Figure S2.** EDX spectrum of the as-prepared MnFe<sub>2</sub>O<sub>4</sub> nanospheres.

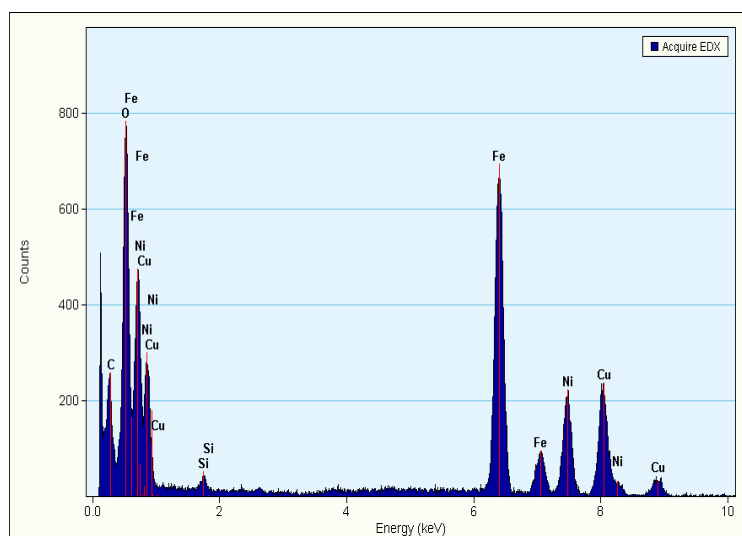

**Figure S3.** EDX spectrum of the as-prepared  $\text{NiFe}_2\text{O}_4$  nanospheres.

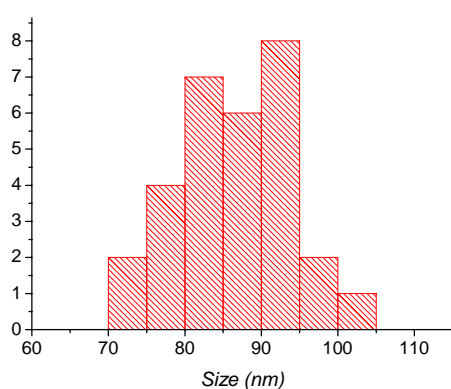

Size distribution of  $\text{MnFe}_2\text{O}_4$

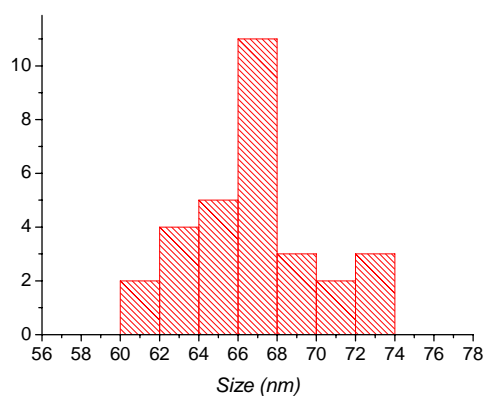

Size distribution of  $\text{ZnFe}_2\text{O}_4$

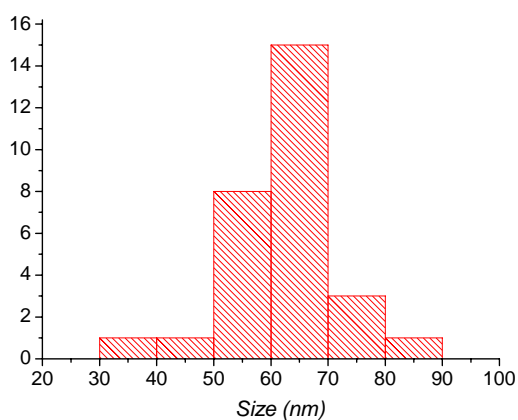

Size distribution of  $\text{NiFe}_2\text{O}_4$

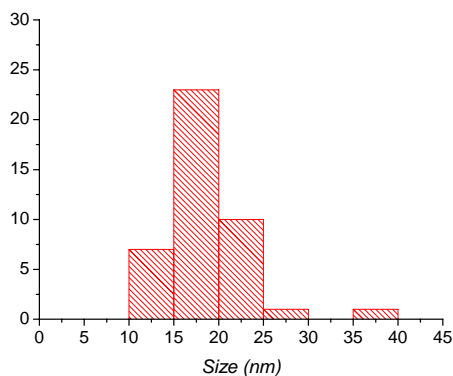

Size distribution of 20 nm Fe<sub>3</sub>O<sub>4</sub>

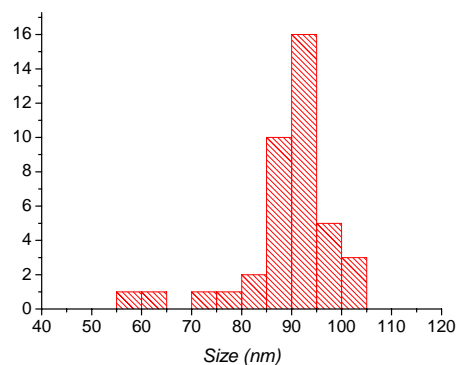

Size distribution of 90 nm Fe<sub>3</sub>O<sub>4</sub>

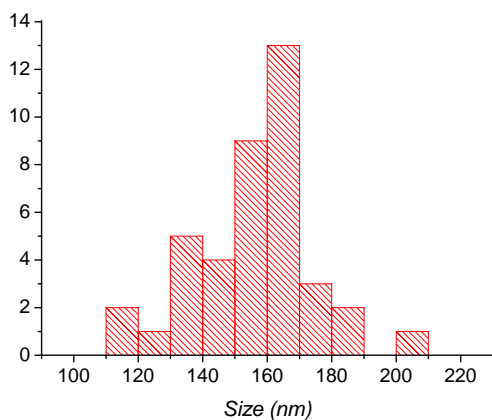

Size distribution of 160 nm Fe<sub>3</sub>O<sub>4</sub>

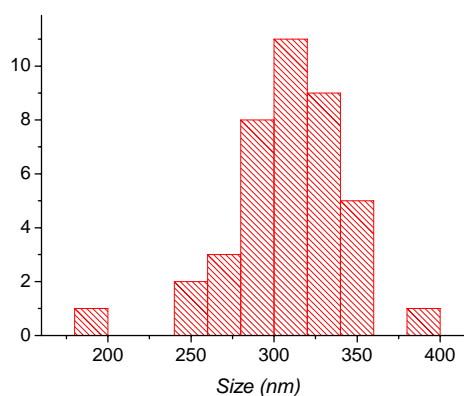

Size distribution of 300 nm Fe<sub>3</sub>O<sub>4</sub>

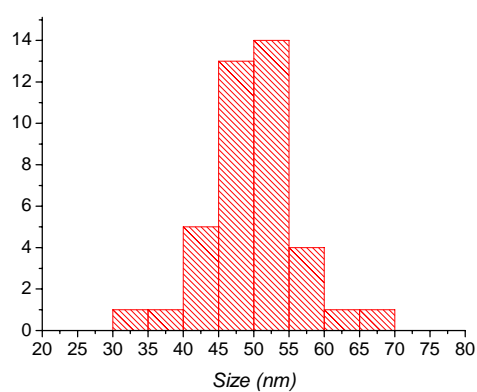

Size distribution of 50 nm Fe<sub>3</sub>O<sub>4</sub>

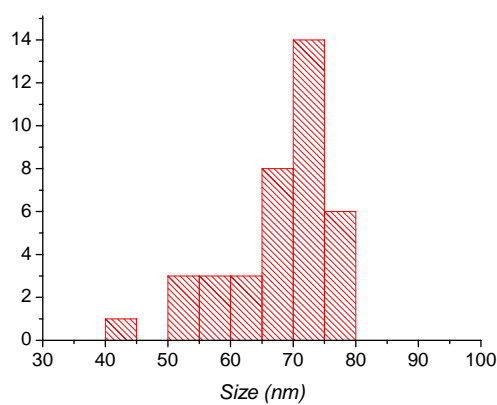

Size distribution of 70 nm Fe<sub>3</sub>O<sub>4</sub>

**Figure S4.** Size distributions of as-prepared magnetic nanospheres from TEM results.

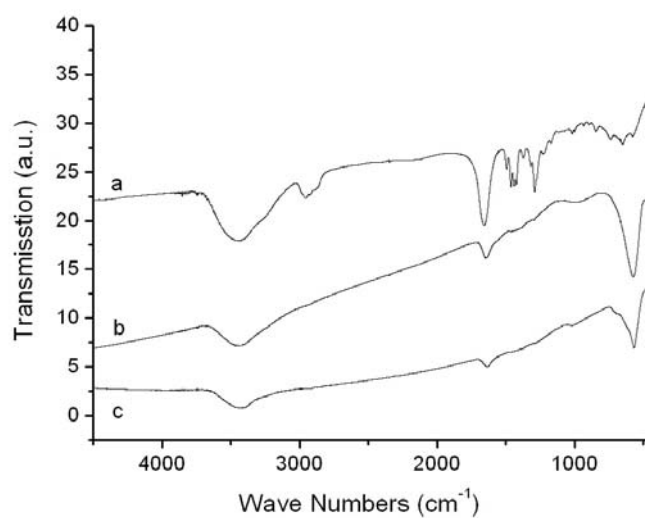

**Figure S5.** FTIR spectrum of (a) PVP, (b)  $\text{ZnFe}_2\text{O}_4$  nanospheres, and (c)  $\text{Fe}_3\text{O}_4$  nanosheets.

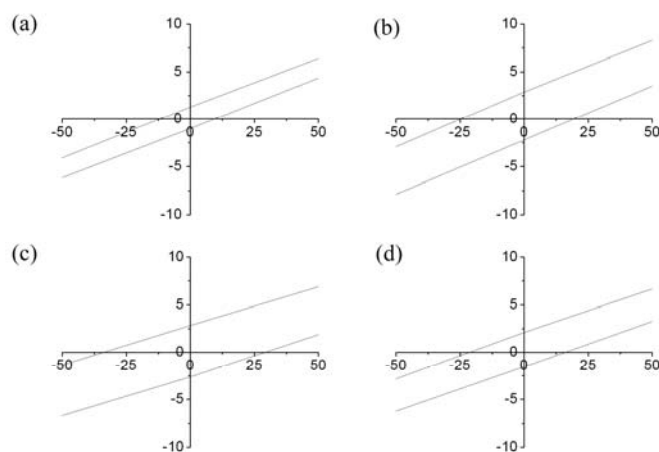

**Figure S6.** Magnified  $M$ - $H$  curves of the  $\text{Fe}_3\text{O}_4$  particles ( $\pm 50$  Oe) which were synthesized by using different ratio of  $V_{EG}/V_{DEG}$ : (a) 1/19 (20 nm), (b) 5/15, (c) 10/10, and (d) 20/0.
